# Supplementary material for: Distribution of the Soil PAHs and Health Risk Influenced by Coal Usage Processes in Taiyuan City, Northern China
Source: MDPI journal article supplement (doi:10.3390/ijerph17176319), 2020-08-31
Supplement: s1 [file s1]

## Distribution of the Soil PAHs and Health Risk Influenced by Coal Usage Processes in Taiyuan City, Northern China

Rongjie Li <sup>1</sup>, Mingchao Cheng <sup>1</sup>, Yang Cui <sup>1</sup>, Qiusheng He <sup>1,\*</sup>, Xiaofang Guo <sup>1</sup>, Ming Liu <sup>2</sup>, Laiguo Chen <sup>2,\*</sup> and Xinming Wang <sup>3</sup>

<sup>1</sup> School of Environment and Safety, Taiyuan University of Science and Technology, Taiyuan 030024, China; tyustlrj@163.com (R.L.); cheng.mingchao@foxmail.com (M.C.); cuiyang@mail.iap.ac.cn (Y.C.); guoxiaofang@tyust.edu.cn (X.G.)

<sup>2</sup> Center of Urban Air Pollution, South China Institute of Environmental Science (SCIES), Ministry of Ecology and Environment of the People's Republic of China, Guangzhou 510655, China; chenlaiguo@scies.org

<sup>3</sup> State Key Laboratory of Organic Geochemistry, Guangzhou Institute of Geochemistry, Chinese Academy of Sciences, Guangzhou 510640, China; wangxm@gig.ac.cn

\* Correspondence: heqs@tyust.edu.cn; Tel.: +86-351-6998326; Fax: +86-351-6998326

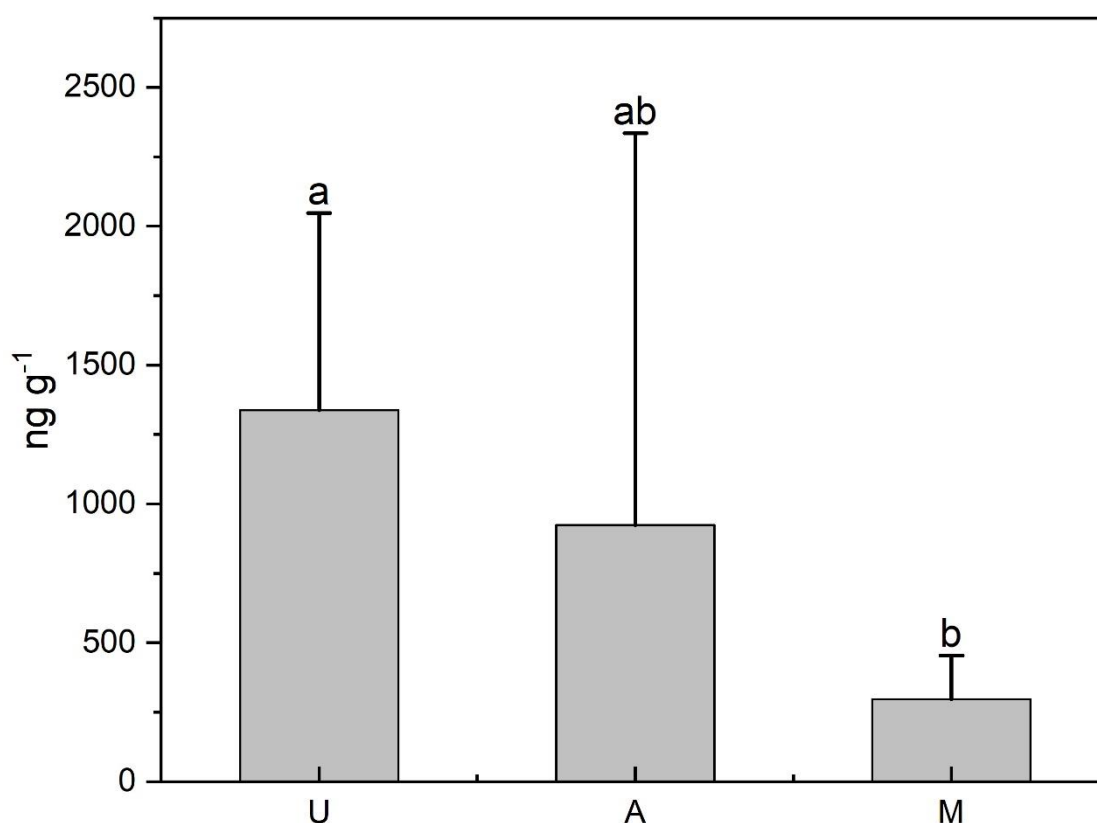

**Figure S1.** The concentration for the urban area (U), agriculture (A) and mountain (M). The error bars represent standard derivations (SD) across all samples.

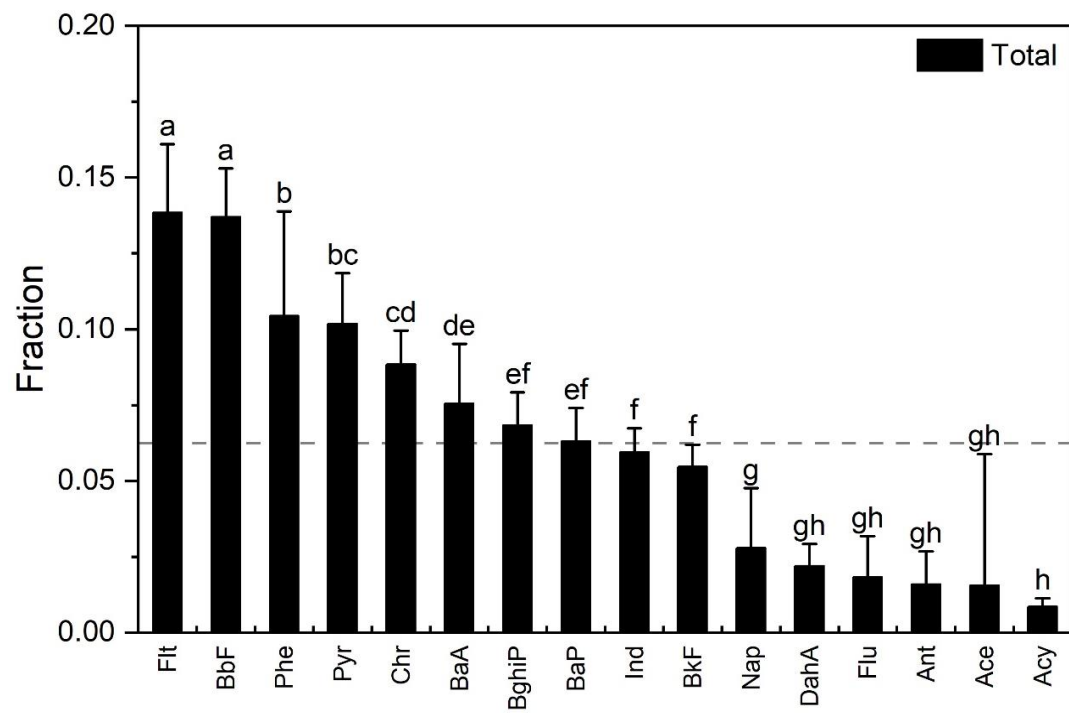

**Figure S2.** The concentration of individual PAH in this study. The error bars represent standard derivations (SD).

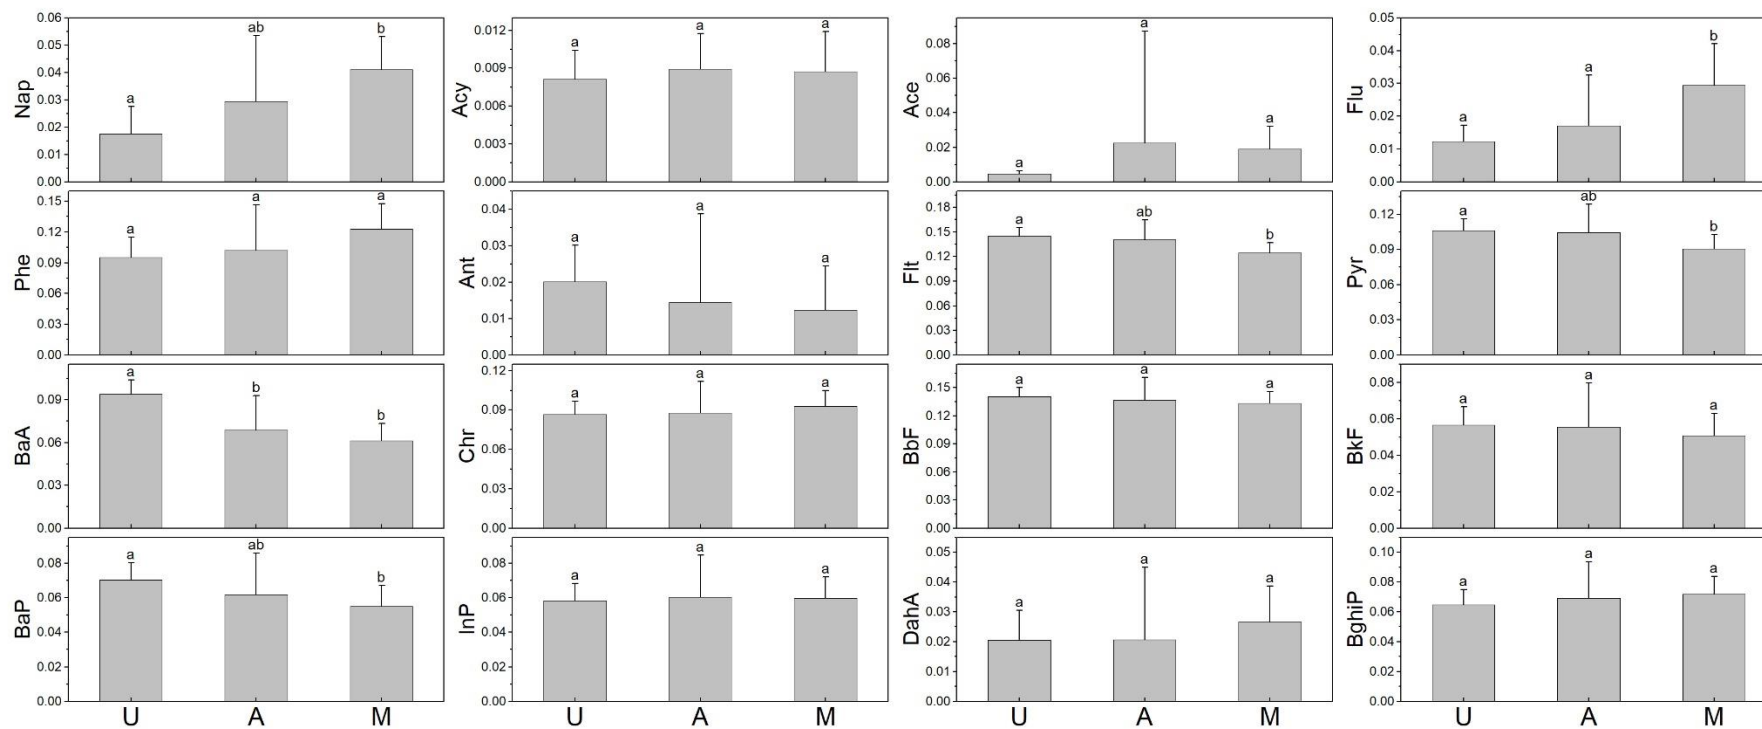

**Figure S3.** The concentration of individual PAH in the urban area (U), agriculture (A) and mountain (M). The error bars represent standard derivations (SD).

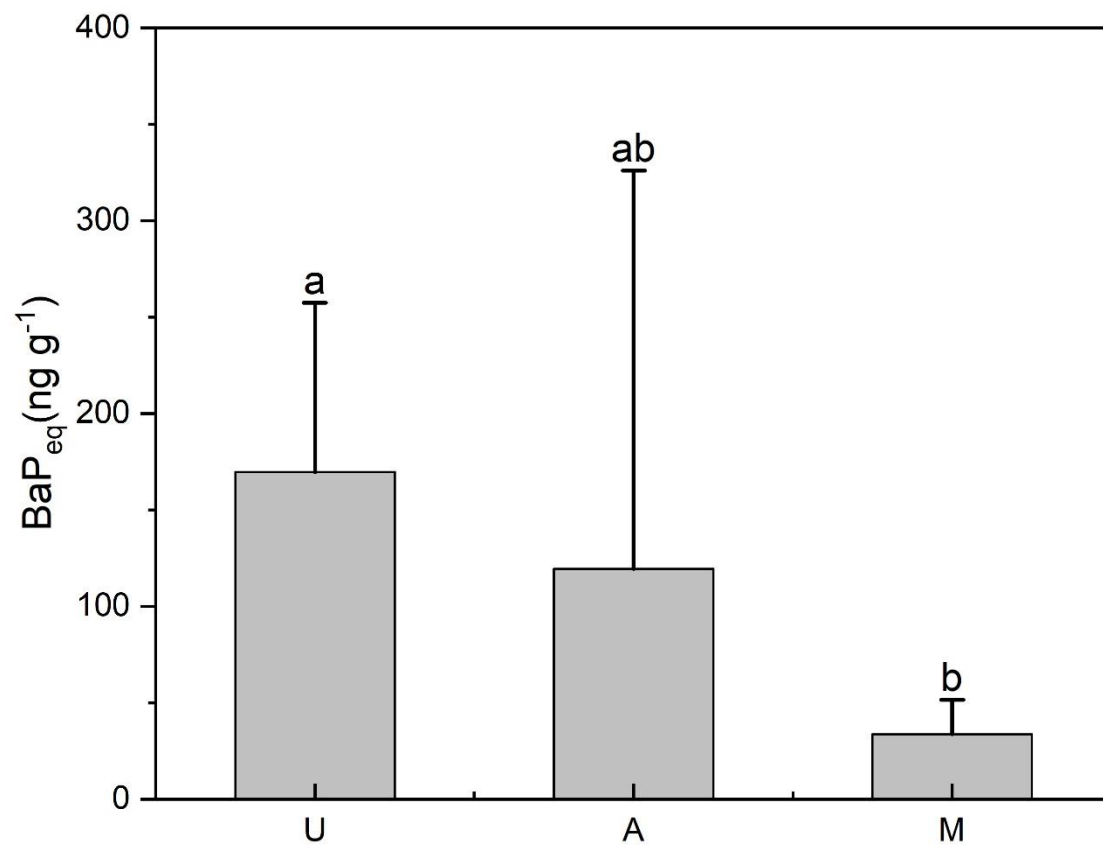

**Figure S4.** The BaP<sub>eq</sub> in the urban area (U), agriculture (A) and mountain (M). The error bars represent standard derivations (SD).
